# Supplementary material for: Markov state models and NMR uncover an overlooked allosteric loop in p53
Source: Royal Society of Chemistry journal article supplement (doi:10.1039/d0sc05053a), 2020-12-16
Supplement: d0sc05053a1.pdf [file d0sc05053a1.pdf]

## Supplementary Information

### Markov State Models and NMR Uncover an Overlooked Allosteric Loop in p53

Emilia P. Barros,<sup>a</sup> Özlem Demir,<sup>a</sup> Jenaro Soto,<sup>b</sup> Melanie J. Cocco,<sup>b,c</sup> and Rommie E. Amaro<sup>\*a</sup>

<sup>a</sup> Department of Chemistry and Biochemistry, University of California San Diego, La Jolla, CA, 92093, USA

<sup>b</sup> Department of Pharmaceutical Sciences, University of California Irvine, Irvine, CA, 92697, USA

<sup>c</sup> Department of Molecular Biology and Biochemistry, University of California Irvine, Irvine, 92697, CA, USA

\* To whom correspondence should be addressed, email: [ramaro@ucsd.edu](mailto:ramaro@ucsd.edu)

## Materials and methods

### *System set up*

The DNA binding domain initial coordinates were taken from chain B of PDB 1TSR, which include p53 amino acids 96 – 289. For the mutant simulations, the tyrosine in position 220 (125 in the clipped domain) was mutated to a cysteine using tleap module in Amber14.<sup>1</sup> The crystallographic water molecules were retained and each system was solvated in an 8Å TIP3P water box.<sup>2</sup> The zinc ion and its coordinating residues were modeled using the cationic dummy atom model.<sup>3</sup> Each system was brought to 0.12 M salt concentration by adding K<sup>+</sup> and Cl<sup>-</sup> atoms. The structure file of each system consisted of about 27,220 atoms, which were prepared using Amber FF14SB force field.<sup>1,4</sup>

### *Molecular dynamics simulations*

The solvated proteins were minimized and equilibrated as described in Malmstrom *et al.*,<sup>5</sup> using the GPU version of Amber 14. To increase the conformational sampling, a round of accelerated MD simulations (aMD)<sup>6</sup> was performed from the equilibrated structure using Amber14. Each system was simulated for 100 ns and 10 structures were selected for each system by clustering the conformations based on RMSD of the center of mass of each residue using a k-means algorithm in MSMBuild<sup>27</sup> and using the cluster centroids. These 10 structures were used as seeds for short unbiased MD simulations, each performed in triplicate with new starting velocities. After each round of simulation, the joint trajectories were processed for MSM model construction, and new starting coordinates were selected, prioritizing the exploration of new areas in the conformational space, until converged models were obtained based on MSM validation metrics (see below). Individual simulations ranged from 10 to 300 ns in length. In total, the wildtype system was simulated for 89  $\mu$ s, while Y220C required 63  $\mu$ s for appropriate model construction.

### *Markov state model construction*

Simulation data was processed and models were built using PyEMMA<sup>8</sup>, version 3.5.6. Features consisted of pairwise distances, with pairs being selected after a tICA-based iterative process that eliminated redundant pairs located consistently close (< 3Å) or far (>10Å) in all frames of the simulations, as well as pairs involving residues located close to the clipped termini, with low variance (<0.05 Å) and those that accounted for low correlation with the first tICs (Supplementary Table 1). The final feature set consisted of 24 pairs (Supplementary Table 2). Time-independent component analysis (tICA)<sup>9</sup> was used to process the joint wildtype and Y220C featurized data. Distinct loop-centered Markov state models were constructed using the 17 features that are centered in L6 and the 7 for L1. Discretization was performed with k-means clustering, k = 200, for each system (wildtype and Y220C) separately, and accuracy of the models verified by implied timescale (ITS) plots and Chapman-Kolmogorov tests (Supplementary Figures 7 and 8). The L6

and L1-focused models were constructed with MSM lag time of 10 ns each. The MSMs were then coarse-grained using hidden Markov state models (HMMs) with a lag time of 3 ns (L1) or 2.5 ns (L6), again validated by ITS plots and Chapman-Kolmogorov tests (Supplementary Figures 9 and 10). The choice of macrostates for coarse graining of the MSMs was guided by the relative separation between neighboring timescales, favoring the number of macrostates that resulted in a timescale ratio above 1.5 with the next timescale. In cases where the consecutive timescales separation were not obvious, we verified the cluster assignments according to the different number of macrostates considered and the Chapman-Kolmogorov tests to decide on the final number of macrostates to proceed with. Standard deviations were calculated using Bayesian hidden Markov state models corresponding to the respective HMMs.

#### *Pocket characterization*

Pocket volume measurements were performed with POVME, version 2.0,<sup>10</sup> and druggability assessments were based on computational solvent mapping of randomly selected conformations from the MSM metastable states using FTMap.<sup>11</sup> Existence of hydrogen bonds across the simulations was probed using MDTraj,<sup>12</sup> with a hydrogen bond defined as established if donor-acceptor distance < 2.5 Å and angle > 120°.

#### *MD ensemble comparison with experimental structures*

For comparison of the conformations sampled by the simulations with experimentally-resolved p53 structures, we transformed the coordinates of wildtype and Y220C structures solved by X-ray crystallography and NMR spectroscopy applying the same feature and tICA transformation steps used for the L1 and L6 MSMs. A total of 58 wildtype and 54 Y220C chains were selected from 16 and 29 PDB entries, respectively, and are listed in Supplementary Tables 3 and 4. These structures were selected out of all wildtype and Y220C deposited structures as they contained the same number of C $\alpha$  atoms to the simulation structures and thus could be directly compared in tICA space. The MD ensemble was also compared to the 2FEJ solution NMR structure's J-coupling and NOE-derived restraints. Distances corresponding to the 2,201 NOE pairs were calculated for the accrued wildtype simulations, and the fraction of frames that exceed the upper distance restraints were computed. Dihedral angles were calculated for the dihedrals identified by the J-coupling restraints, and violations computed when the average dihedral angle was outside the interval defined by the experimental value +/- experimental error.

#### *NMR data collection and sample preparation*

WT p53 construct was provided by Rainer Brachman. <sup>15</sup>N-labeled p53 DBD was prepared similarly to Wong *et al.*<sup>13</sup> The DBD core domain of human p53 (94-312) was transformed into BL21 *E. Coli* cells. Bacteria were grown at 30 °C in <sup>15</sup>N-enriched Neidharts minimal media to a density of 0.8-1.0

OD<sub>(550 nm)</sub>. The temperature was lowered to 18 °C and both IPTG and ZnCl<sub>2</sub> were added to a final concentration of 1 mM. Cells were allowed to grow for an additional 6-8 hours and then harvested by centrifugation. The frozen cell pellet was resuspended in 20mM sodium phosphate, pH7.2, 10 mM BME, 0.5 mM PMSF, and lysed using sonication. Cell debris were removed by centrifugation at 4 °C for 30 minutes. The supernatant was applied to a SP-sepharose column and the protein eluted with a gradient of 100 mM- 600mM NaCl. Samples were dialyzed into 15 mM potassium chloride, 25 mM sodium phosphate, pH 7.1, 10 mM BME and concentrated to a protein concentration of 400 μM.

All NMR experiments were performed on Varian Inova 800 MHz at 20 °C. NMR data were processed using nmrPipe.<sup>14</sup> Residues assignments and rate measurements (using peak volumes) in all 2D HSQC spectra were accomplished using CcpNmr Analysis.<sup>15</sup>

3D <sup>15</sup>N-TOCSY-HSQC (t<sub>m</sub> = 75 ms) and NOESY-HSQC (t<sub>m</sub> = 100 ms) were analyzed for assignment of backbone amide resonances. Published WT assignments<sup>13</sup> were confirmed in spectra of our WT sample.

#### Relaxation analysis

T1 and T2 spectra were recorded with relaxation delays of 10, 50, 100, 200, 400, 750, 1000, 1500 ms and 10, 30, 50, 70, 90, 110, 130, 150 ms, respectively. The NOE spectra were recorded with a 5 second irradiation and 3 second delay. R1 and R2 rates were obtain by measuring peak volume as a function of delay time and fitting them to a single exponential function with CcpNmr software.<sup>15</sup> Errors in relaxations rates were obtained through the covariance method in CcpNmr. R2/R1 error bars are a results of error propagation of both R1 and R2:

$$Error\ bar = R2/R1 \times \sqrt{\left(\frac{R1\ error}{R1}\right)^2 + \left(\frac{R2\ error}{R2}\right)^2}$$

NOE errors were calculated by the following equation:

$$Error = |NOE\ ratio| \times \sqrt{\left(\frac{NOE\ spectra\ noise}{NOE\ peak\ volume}\right)^2 + \left(\frac{reference\ spectra\ noise}{reference\ peak\ volume}\right)^2}$$

NMR generalized order parameters (S<sup>2</sup>) were obtained by using *Modelfree 4.15*<sup>16,17</sup> in combination with *FASTModelfree*.<sup>18</sup> Initial estimation of *Modelfree* parameters were obtained through the programs *pdbinertia*, *r2r1\_tm*, *quadric\_diffusion* from the CoMD/NMR website.<sup>19</sup> Residues with NOE and X<sup>2</sup> values less than 0.6 and 10, respectively, were excluded from *quadric\_diffusion* calculation. Our analysis was performed using the Protein Data Bank (PDB) file 2FEJ. All *FASTModelfree* analysis used an NH bond length of 1.015 Å and chemical shift entropy (CSA) value of -179 ppm similar to the previously published analysis of p53 DBD.<sup>20</sup> *FASTModelfree* analysis proceeded until all parameters converged.

**Supplementary Table 1.** Stepwise tICA-based selection of features for model building.

| Iteration | Number of features | Number of tICs | Correlation cutoff | Constraints for next round                                                       |
|-----------|--------------------|----------------|--------------------|----------------------------------------------------------------------------------|
| 0         | 18,336             | -              | -                  | Remove pairs located $< 3 \text{ \AA}$ or $> 10 \text{ \AA}$ apart in all frames |
| 1         | 7,183              | -              | -                  | Remove pairs with distance variance $< 0.05 \text{ \AA}$                         |
| 2         | 2,225              | -              | -                  | Remove pairs involving terminal residues                                         |
| 3         | 729                | 315            | 0.4                | None applied                                                                     |
| 4         | 499                | 122            | 0.5                | None applied                                                                     |
| 5         | 354                | 91             | 0.6                | None applied                                                                     |
| 6         | 194                | 57             | 0.6                | None applied                                                                     |
| 7         | 90                 | 29             | -                  | Remove features that involve residues close to termini                           |
| 8         | 82                 | 26             | -                  | Remove similar pairs                                                             |
| 9         | 35                 | 16             | 0.75               | Remove similar pairs                                                             |
| Final     | 24                 | 13             |                    |                                                                                  |

**Supplementary Table 2.** Pairs used for featurization of the simulations for model construction

| <b>Member 1<br/>(Anchor residue)</b> | <b>Member 2</b> |
|--------------------------------------|-----------------|
| Ser116                               | Leu145          |
| Ser116                               | Val147          |
| Ser116                               | Thr150          |
| Ser116                               | Tyr220          |
| Ser116                               | Cys229          |
| Ser116                               | Gly279          |
| Ser116                               | Arg280          |
| Pro223                               | Gly112          |
| Pro223                               | Leu114          |
| Pro223                               | Val143          |
| Pro223                               | Leu145          |
| Pro223                               | Thr230          |
| Glu224                               | Pro153          |
| Glu224                               | Gly154          |
| Glu224                               | Cys229          |
| Glu224                               | Ser260          |
| Glu224                               | Ser261          |
| Gly226                               | Thr155          |
| Gly226                               | Arg156          |
| Gly226                               | Pro219          |
| Gly226                               | Tyr220          |
| Gly226                               | Glu221          |
| Gly226                               | Glu258          |
| Gly226                               | Ser260          |

**Supplementary Table 3.** Wildtype X-ray structures used for comparison with simulations' conformational landscape

| <b>PDB ID</b> | <b>Chain ID</b> |
|---------------|-----------------|
|---------------|-----------------|

|      |                         |
|------|-------------------------|
| 1GZH | C                       |
| 1KZY | A,B                     |
| 1TSR | A,B,C                   |
| 1TUP | A,B,C                   |
| 2AC0 | A,B,C,D                 |
| 2ADY | A,B                     |
| 2AHI | A,B,D                   |
| 2ATA | A,B,C,D                 |
| 2H1L | M,N,O,P,Q,R,S,T,U,V,W,X |
| 2OCJ | A,B,C,D                 |
| 2XWR | A,B                     |
| 2YBG | C,D                     |
| 3KMD | A,B,C,D                 |
| 3Q05 | A,B,C,D                 |
| 3TS8 | A,B,C,D                 |
| 4HJE | A,B,C,D                 |

**Supplementary Table 4.** Y220C X-ray structures used for comparison with simulations' conformational landscape

| PDB ID | Chain ID |
|--------|----------|
|--------|----------|

|      |     |
|------|-----|
| 2J1X | A   |
| 2VUK | A,B |
| 2X0U | A   |
| 2X0V | A,B |
| 2X0W | A   |
| 3ZME | A,B |
| 4AGL | A,B |
| 4AGM | A,B |
| 4AGN | A,B |
| 4AGO | A,B |
| 4AGP | A,B |
| 4AGQ | A,B |
| 5A7B | A,B |
| 5AB9 | A,B |
| 5ABA | A,B |
| 5AOI | A,B |
| 5AOJ | A,B |
| 5AOK | A,B |
| 5AOL | B   |
| 5AOM | A,B |
| 5G4M | A,B |
| 5G4N | A,B |
| 5G4O | A,B |
| 6GGA | A,B |
| 6GGB | A,B |
| 6GGC | A,B |
| 6GGD | A,B |
| 6GGE | A,B |
| 6GGF | A,B |

**Supplementary Table 5.** Persistence of L6-S3/S4 hydrogen bonds (in % of frames in the simulation)



| Donor atom    | Acceptor atom  | Wildtype | Y220C |
|---------------|----------------|----------|-------|
| Thr149 - N    | Gly225 - O     | 0        | 0.7   |
| Thr149 - N    | Asp227 – OD1   | 1.4      | 2.4   |
| Thr149 - N    | Asp227 – OD2   | 1.3      | 3.19  |
| Cys219 – N    | Thr154 - O     | 97.0     | 85.1  |
| Ser226 – N    | Thr149 – OG1   | 7.3      | 4.9   |
| Asp227 - N    | Thr149 – OG1   | 0.2      | 1.9   |
| Thr149 – OG1* | Pro222 – O*    | 0.09     | 9.0   |
| Thr149 – OG1  | Val224 – O     | 0.02     | 1.0   |
| Thr149 – OG1  | Gly225 – O     | 0.04     | 1     |
| Thr149 – OG1  | Ser226 – OG    | 0.06     | 0.8   |
| Thr149 – OG1  | Ser226 – O     | 1.5      | 0.9   |
| Thr149 – OG1  | Asp227 – OD1   | 3.7      | 6.6   |
| Thr149 – OG1  | Asp227 – OD2   | 3.8      | 7.3   |
| Thr149 – OG1  | Asp227 – O     | 0.07     | 0.9   |
| Thr154 – OG1  | Cys219 - O     | 0.2      | 5.8   |
| Ser226 - OG   | Asp147 - O     | 0.01     | 1.1   |
| Ser226 - OG   | Thr54149 – OG1 | 0.3      | 1.0   |

\* Interaction formed in the mutant-exclusive “sideways-bent” extended state

**Supplementary Table 6.** R1, R2, NOE, and S<sup>2</sup> values for Wildtype p53 DBD at 800 MHz field strength.

| Residue # | R1 ± error (s <sup>-1</sup> ) | R2 ± error (s <sup>-1</sup> ) | NOE ± error | S2 ± error |
|-----------|-------------------------------|-------------------------------|-------------|------------|
|-----------|-------------------------------|-------------------------------|-------------|------------|

|     |               |                |               |               |
|-----|---------------|----------------|---------------|---------------|
| 99  | 1.485 ± 0.361 | 30.43 ± 0.654  | 0.795 ± 0.010 | †             |
| 100 | 1.318 ± 0.284 | 28.36 ± 2.246  | 0.765 ± 0.012 | 0.791 ± 0.066 |
| 101 | 1.260 ± 0.275 | 31.81 ± 1.290  | 0.907 ± 0.006 | †             |
| 102 | 1.209 ± 0.254 | 33.77 ± 4.850  | 0.657 ± 0.010 | 0.788 ± 0.089 |
| 103 | 1.087 ± 0.162 | 28.69 ± 0.811  | 0.711 ± 0.010 | 0.857 ± 0.027 |
| 104 |               |                |               |               |
| 105 | 1.383 ± 0.287 | 35.68 ± 1.806  | 0.717 ± 0.009 | 0.645 ± 0.141 |
| 106 |               |                |               |               |
| 107 | 1.255 ± 0.233 | 33.81 ± 2.730  | 0.820 ± 0.009 | †             |
| 108 | 1.048 ± 0.213 | 42.69 ± 3.544  | 0.977 ± 0.010 | †             |
| 109 |               |                |               |               |
| 110 | 1.056 ± 0.206 | 31.40 ± 4.243  | 0.830 ± 0.013 | 1.000 ± 0.080 |
| 111 | 0.806 ± 0.119 | 33.32 ± 1.186  | 0.745 ± 0.010 | 0.905 ± 0.047 |
| 112 | 0.773 ± 0.184 | **             | 1.000 ± 0.018 |               |
| 113 |               | 28.78 ± 2.079  |               |               |
| 114 | 0.979 ± 0.197 | 28.25 ± 1.185  | 0.775 ± 0.011 | 0.848 ± 0.036 |
| 115 | 1.718 ± 0.671 | 24.75 ± 3.405  | 0.379 ± 0.016 | 0.854 ± 0.091 |
| 116 |               |                |               |               |
| 117 | 1.561 ± 0.461 | 30.35 ± 4.726  | 0.779 ± 0.018 | †             |
| 118 | 1.990 ± 0.508 |                | 0.923 ± 0.016 |               |
| 119 |               |                |               |               |
| 120 |               |                |               |               |
| 121 | 2.192 ± 0.573 | 29.47 ± 3.104  | 0.732 ± 0.014 | †             |
| 122 |               |                |               |               |
| 123 | 1.407 ± 0.434 | 34.21 ± 3.314  | 1.000 ± 0.027 |               |
| 124 | 1.172 ± 0.201 | 29.86 ± 0.850  | 0.876 ± 0.009 | 1.000 ± 0.024 |
| 125 | 0.923 ± 0.148 | 28.53 ± 0.271  | 0.854 ± 0.009 | 1.000 ± 0.008 |
| 126 | 1.355 ± 0.274 | 26.99 ± 2.243  | 0.913 ± 0.012 | 1.000 ± 0.063 |
| 127 | 0.884 ± 0.240 | 26.60 ± 3.197  | 0.866 ± 0.015 | 1.000 ± 0.080 |
| 128 |               |                |               |               |
| 129 |               |                |               |               |
| 130 | 0.933 ± 0.192 | 76.46 ± 22.161 | 0.930 ± 0.011 | †             |
| 131 |               |                |               |               |
| 132 | 0.923 ± 0.160 | 34.34 ± 1.178  | 0.730 ± 0.009 | 0.858 ± 0.062 |
| 133 | 0.820 ± 0.205 |                | 0.775 ± 0.021 |               |
| 134 | 0.892 ± 0.114 | 30.62 ± 3.896  | 0.817 ± 0.013 | 1.000 ± 0.060 |
| 135 | 1.061 ± 0.205 | 32.10 ± 2.578  | 0.784 ± 0.009 | 0.872 ± 0.071 |
| 136 | 0.953 ± 0.174 | 29.92 ± 5.053  | 0.764 ± 0.011 | 0.940 ± 0.078 |
| 137 | 0.860 ± 0.150 | 27.96 ± 1.204  | 0.743 ± 0.013 | 0.872 ± 0.038 |
| 138 | 0.690 ± 0.164 | 28.16 ± 3.482  | 0.885 ± 0.016 | 0.906 ± 0.089 |

|     |               |               |               |               |
|-----|---------------|---------------|---------------|---------------|
| 139 | 1.054 ± 0.204 | 27.36 ± 1.265 | 0.820 ± 0.010 | 0.898 ± 0.033 |
| 140 | 0.996 ± 0.163 | 30.71 ± 1.633 | 0.785 ± 0.008 | 0.879 ± 0.042 |
| 141 | 0.925 ± 0.190 | 36.04 ± 2.876 | 0.907 ± 0.013 | 1.000 ± 0.054 |
| 142 |               |               |               |               |
| 143 | 0.827 ± 0.069 | 29.74 ± 3.598 | 0.642 ± 0.010 | 0.848 ± 0.031 |
| 144 | 1.371 ± 0.230 |               | 0.541 ± 0.009 | 0.289 ± 0.279 |
| 145 | 0.692 ± 0.093 | 39.78 ± 3.833 | 0.855 ± 0.013 | 1.000 ± 0.060 |
| 146 | 0.878 ± 0.158 | 29.38 ± 1.939 |               |               |
| 147 | 0.950 ± 0.098 | 30.32 ± 1.871 | 0.711 ± 0.008 | 1.000 ± 0.038 |
| 148 | 0.893 ± 0.153 | 28.80 ± 2.982 | 1.000 ± 0.014 | †             |
| 149 | 0.865 ± 0.145 | 27.82 ± 1.366 | 0.918 ± 0.007 | †             |
| 150 | 0.979 ± 0.167 | 28.69 ± 0.651 | 0.832 ± 0.006 | 0.932 ± 0.018 |
| 151 |               |               |               |               |
| 152 |               |               |               |               |
| 153 |               |               |               |               |
| 154 |               |               |               |               |
| 155 | 0.870 ± 0.124 | 32.19 ± 2.627 | 0.689 ± 0.007 | 0.934 ± 0.055 |
| 156 | 0.823 ± 0.106 | 31.88 ± 0.328 | 0.830 ± 0.010 | 0.937 ± 0.011 |
| 157 | 0.774 ± 0.078 | 30.59 ± 1.577 | 0.858 ± 0.011 | 0.979 ± 0.037 |
| 158 | 1.037 ± 0.201 | 36.18 ± 5.200 | 0.896 ± 0.011 | 1.000 ± 0.083 |
| 159 | 1.009 ± 0.270 | 33.48 ± 3.200 | 0.833 ± 0.013 | 1.000 ± 0.053 |
| 160 | 1.040 ± 0.178 | 33.32 ± 1.551 | 0.983 ± 0.014 | †             |
| 161 | 0.759 ± 0.168 | **            | 0.609 ± 0.016 |               |
| 162 | 0.887 ± 0.173 | **            | 0.864 ± 0.011 |               |
| 163 | 1.114 ± 0.299 | *             | 0.978 ± 0.023 |               |
| 164 |               |               |               |               |
| 165 |               |               |               |               |
| 166 |               |               |               |               |
| 167 |               |               |               |               |
| 168 |               | 32.56 ± 0.841 |               |               |
| 169 | 1.164 ± 0.257 | 38.47 ± 2.541 | 0.849 ± 0.010 | 1.000 ± 0.046 |
| 170 | 1.885 ± 0.445 |               | 0.645 ± 0.010 |               |
| 171 | 1.265 ± 0.262 | 35.89 ± 2.385 | 0.836 ± 0.007 | 1.000 ± 0.054 |
| 172 | 1.123 ± 0.206 | 31.12 ± 2.398 | 0.835 ± 0.010 | 1.000 ± 0.051 |
| 173 | 1.220 ± 0.170 | *             | 0.871 ± 0.019 |               |
| 174 | 1.208 ± 0.277 | 37.97 ± 4.934 | 1.000 ± 0.011 | †             |
| 175 | 1.256 ± 0.365 | **            | 0.638 ± 0.016 |               |
| 176 |               |               |               |               |
| 177 |               |               |               |               |
| 178 |               | 30.25 ± 0.508 | 1.000 ± 0.006 |               |

|     |               |               |               |               |
|-----|---------------|---------------|---------------|---------------|
| 179 | 0.845 ± 0.094 | 34.63 ± 4.812 | 0.871 ± 0.011 | 1.000 ± 0.061 |
| 180 | 1.100 ± 0.195 | 37.32 ± 0.588 | 0.855 ± 0.010 | 1.000 ± 0.014 |
| 181 | 0.984 ± 0.166 | 38.27 ± 1.342 | 0.888 ± 0.010 | 1.000 ± 0.022 |
| 182 | 1.325 ± 0.231 | 33.77 ± 0.584 | 0.826 ± 0.008 | †             |
| 183 |               |               |               |               |
| 184 | 1.862 ± 0.468 |               | 0.855 ± 0.011 |               |
| 185 | 0.959 ± 0.191 | 30.68 ± 1.257 | 0.824 ± 0.008 | 0.938 ± 0.029 |
| 186 | 1.831 ± 0.361 | 25.83 ± 0.958 | 0.876 ± 0.009 | 0.776 ± 0.027 |
| 187 | 1.544 ± 0.275 | 27.05 ± 1.468 | 0.669 ± 0.008 | 0.540 ± 0.131 |
| 188 | 1.250 ± 0.223 | 25.80 ± 1.758 | 0.544 ± 0.007 | 0.641 ± 0.118 |
| 189 | 1.000 ± 0.172 | 25.45 ± 2.785 | 0.944 ± 0.017 | †             |
| 190 |               |               |               |               |
| 191 |               |               |               |               |
| 192 | 1.266 ± 0.273 | 21.52 ± 2.605 | 0.776 ± 0.011 | 0.675 ± 0.071 |
| 193 | 1.133 ± 0.278 | 36.58 ± 1.683 | 0.837 ± 0.011 | 1.000 ± 0.028 |
| 194 |               |               |               |               |
| 195 | 1.669 ± 0.747 |               | 0.815 ± 0.022 |               |
| 196 | 0.821 ± 0.150 |               | 0.719 ± 0.013 |               |
| 197 |               |               |               |               |
| 198 | 0.830 ± 0.116 | 28.91 ± 1.925 | 0.725 ± 0.010 | 0.904 ± 0.042 |
| 199 | 1.069 ± 0.193 | 26.88 ± 0.249 | 0.782 ± 0.010 | 0.889 ± 0.010 |
| 200 | 1.137 ± 0.195 | 26.18 ± 0.654 | 0.779 ± 0.007 | 0.798 ± 0.069 |
| 201 | 1.060 ± 0.314 | 29.00 ± 1.992 | 0.807 ± 0.019 | 0.851 ± 0.053 |
| 202 | 0.799 ± 0.098 | 31.51 ± 1.085 | 0.836 ± 0.008 | 1.000 ± 0.021 |
| 203 | 0.844 ± 0.088 | 28.17 ± 1.721 | 0.653 ± 0.007 | 0.837 ± 0.033 |
| 204 | 0.839 ± 0.057 | 31.78 ± 1.478 | 0.795 ± 0.010 | 0.906 ± 0.024 |
| 205 | 0.755 ± 0.105 | 33.81 ± 1.180 | 0.890 ± 0.010 | 1.000 ± 0.021 |
| 206 | 0.968 ± 0.169 | 33.20 ± 3.624 | 0.656 ± 0.012 | 0.815 ± 0.072 |
| 207 |               |               |               |               |
| 208 | 1.005 ± 0.186 | 20.76 ± 1.623 | 0.636 ± 0.008 | 0.761 ± 0.058 |
| 209 | 0.955 ± 0.213 | 30.69 ± 2.027 |               |               |
| 210 | 1.116 ± 0.156 | 28.50 ± 1.283 | 0.692 ± 0.007 | 0.824 ± 0.072 |
| 211 | 0.870 ± 0.173 | 27.78 ± 1.765 | 0.756 ± 0.015 | 0.911 ± 0.044 |
| 212 | 0.986 ± 0.130 | 33.73 ± 4.092 | 0.807 ± 0.012 | 0.862 ± 0.042 |
| 213 | 1.062 ± 0.255 | 32.79 ± 0.978 |               |               |
| 214 | 1.530 ± 0.371 | 27.03 ± 7.639 | 0.830 ± 0.017 | 1.000 ± 0.127 |
| 215 | 1.065 ± 0.218 | *             | 0.802 ± 0.014 |               |
| 216 | 1.323 ± 0.276 | 30.35 ± 1.261 | 0.761 ± 0.006 | 0.659 ± 0.088 |
| 217 | 0.824 ± 0.166 | 29.17 ± 5.349 | 1.000 ± 0.012 | †             |
| 218 | 0.869 ± 0.111 | 35.61 ± 4.136 | 0.844 ± 0.011 | 1.000 ± 0.064 |

|     |               |               |               |               |
|-----|---------------|---------------|---------------|---------------|
| 219 |               |               |               |               |
| 220 | 0.778 ± 0.090 | 25.48 ± 2.771 | 0.919 ± 0.010 | †             |
| 221 | 0.694 ± 0.066 | 34.36 ± 2.672 | 0.766 ± 0.008 | 0.948 ± 0.025 |
| 222 |               |               |               |               |
| 223 |               |               |               |               |
| 224 | 0.982 ± 0.124 | 24.56 ± 0.762 | 0.482 ± 0.006 | 0.790 ± 0.026 |
| 225 |               |               |               |               |
| 226 | 1.173 ± 0.222 | 25.92 ± 0.488 | 0.303 ± 0.009 | 0.755 ± 0.017 |
| 227 |               |               |               |               |
| 228 | 1.476 ± 0.368 | 24.11 ± 2.166 | 0.528 ± 0.009 | 0.664 ± 0.065 |
| 229 | 1.143 ± 0.219 | 30.11 ± 1.104 | 0.805 ± 0.006 | 0.867 ± 0.025 |
| 230 | 1.375 ± 0.193 | 16.88 ± 0.410 | 0.727 ± 0.007 | 0.452 ± 0.017 |
| 231 | 0.909 ± 0.143 | 26.67 ± 0.665 | 0.891 ± 0.009 | 0.962 ± 0.022 |
| 232 | 0.773 ± 0.092 | 31.50 ± 1.835 |               |               |
| 233 | 1.212 ± 0.167 | 13.47 ± 0.814 | 0.570 ± 0.007 | 0.360 ± 0.026 |
| 234 | 0.870 ± 0.164 | 26.40 ± 3.284 | 0.813 ± 0.013 | 0.909 ± 0.052 |
| 235 | 0.804 ± 0.132 | 32.41 ± 2.290 | 0.769 ± 0.010 | 0.933 ± 0.041 |
| 236 | 0.889 ± 0.224 | 27.46 ± 2.910 | 0.667 ± 0.015 | 0.889 ± 0.066 |
| 237 | 0.993 ± 0.222 | **            | 0.789 ± 0.019 |               |
| 238 | 0.922 ± 0.149 | 38.71 ± 2.767 | 0.828 ± 0.008 | 0.966 ± 0.037 |
| 239 | 0.910 ± 0.196 | *             | 0.821 ± 0.020 |               |
| 240 | 0.817 ± 0.265 | 30.28 ± 4.720 | 1.000 ± 0.020 | †             |
| 241 | 1.390 ± 0.390 | 37.53 ± 1.806 | 0.818 ± 0.014 | 1.000 ± 0.053 |
| 242 | 1.290 ± 0.237 | 35.10 ± 1.120 | 0.857 ± 0.008 | 1.000 ± 0.028 |
| 243 |               | **            | 0.641 ± 0.009 |               |
| 244 | 0.691 ± 0.349 |               | 0.441 ± 0.024 |               |
| 245 | 1.356 ± 0.316 | 29.32 ± 4.274 | 0.752 ± 0.011 | 0.750 ± 0.098 |
| 246 |               |               |               |               |
| 247 |               |               |               |               |
| 248 |               |               |               |               |
| 249 |               |               |               |               |
| 250 |               |               |               |               |
| 251 | 1.238 ± 0.228 | **            | 0.891 ± 0.017 |               |
| 252 | 0.877 ± 0.152 | 32.91 ± 3.637 | 1.000 ± 0.016 | †             |
| 253 | 0.777 ± 0.093 | 30.40 ± 3.035 | 0.794 ± 0.011 | 0.952 ± 0.041 |
| 254 | 0.905 ± 0.152 | 27.89 ± 6.521 | 0.749 ± 0.010 | 0.927 ± 0.060 |
| 255 | 0.735 ± 0.142 | 35.66 ± 3.189 | 0.804 ± 0.011 | 0.953 ± 0.045 |
| 256 | 1.019 ± 0.164 | **            | 0.880 ± 0.011 |               |
| 257 | 0.821 ± 0.151 | 32.81 ± 0.732 | 0.978 ± 0.014 | †             |
| 258 | 0.797 ± 0.097 | 30.05 ± 4.498 | 0.744 ± 0.008 | 0.921 ± 0.038 |

|     |               |               |               |               |
|-----|---------------|---------------|---------------|---------------|
| 259 |               |               |               |               |
| 260 | 1.313 ± 0.234 | 28.84 ± 1.114 | 0.708 ± 0.009 | 0.720 ± 0.116 |
| 261 | 1.147 ± 0.195 | 30.43 ± 0.760 | 0.679 ± 0.006 | 0.805 ± 0.096 |
| 262 | 1.112 ± 0.200 | 28.30 ± 1.457 | 0.684 ± 0.007 | 0.766 ± 0.091 |
| 263 | 0.873 ± 0.088 | 29.22 ± 1.271 | 0.763 ± 0.006 | 0.884 ± 0.031 |
| 264 | 0.935 ± 0.140 | 25.10 ± 1.018 | 0.836 ± 0.008 | 0.939 ± 0.024 |
| 265 | 0.870 ± 0.112 | 24.07 ± 2.226 | 0.679 ± 0.011 | 0.843 ± 0.041 |
| 266 | 0.767 ± 0.099 | 35.92 ± 4.275 | 0.798 ± 0.012 | 0.979 ± 0.050 |
| 267 | 1.042 ± 0.181 | 34.64 ± 3.027 | 0.706 ± 0.013 | 0.777 ± 0.079 |
| 268 | 0.755 ± 0.134 | 36.05 ± 0.948 | 0.777 ± 0.009 | 0.913 ± 0.051 |
| 269 | 0.949 ± 0.176 | 28.42 ± 1.107 | 0.839 ± 0.008 | 0.941 ± 0.024 |
| 270 | 0.887 ± 0.130 | 32.60 ± 2.098 | 0.834 ± 0.010 | 1.000 ± 0.036 |
| 271 | 0.876 ± 0.163 | 23.84 ± 2.207 | 0.990 ± 0.011 | †             |
| 272 |               |               |               |               |
| 273 | 0.907 ± 0.154 | 33.35 ± 4.561 | 0.739 ± 0.012 | 0.948 ± 0.071 |
| 274 | 1.052 ± 0.308 | **            | 0.748 ± 0.012 |               |
| 275 | 0.917 ± 0.159 | 32.24 ± 3.800 | 0.831 ± 0.011 | 1.000 ± 0.068 |
| 276 |               |               |               |               |
| 277 | 1.334 ± 0.288 | 30.05 ± 1.155 | 0.700 ± 0.007 | 0.872 ± 0.038 |
| 278 |               |               |               |               |
| 279 | 1.037 ± 0.172 | 37.30 ± 4.563 | 0.704 ± 0.010 | 0.775 ± 0.079 |
| 280 | 0.969 ± 0.190 | 31.54 ± 2.781 | 0.885 ± 0.011 | 1.000 ± 0.054 |
| 281 | 1.014 ± 0.149 | 31.55 ± 1.412 | 0.893 ± 0.009 | 0.995 ± 0.028 |
| 282 | 0.907 ± 0.142 | 35.02 ± 4.009 | 1.000 ± 0.012 | †             |
| 283 | 0.810 ± 0.133 | 32.90 ± 0.830 | 0.730 ± 0.007 | 0.892 ± 0.053 |
| 284 | 1.009 ± 0.151 | 30.11 ± 0.433 | 0.635 ± 0.005 | 0.899 ± 0.013 |
| 285 | 0.930 ± 0.124 | 29.24 ± 1.380 | 0.749 ± 0.007 | 0.879 ± 0.039 |
| 286 | 0.838 ± 0.105 | 32.58 ± 2.887 | 0.821 ± 0.009 | 0.909 ± 0.027 |
| 287 | 0.845 ± 0.107 | 28.96 ± 1.542 | 0.694 ± 0.007 | 0.904 ± 0.037 |
| 288 | 0.886 ± 0.101 | 32.04 ± 0.495 | 0.764 ± 0.006 | 0.853 ± 0.044 |
| 289 | 0.844 ± 0.066 | 27.71 ± 0.712 | 0.759 ± 0.006 | 0.868 ± 0.018 |
| 290 |               |               |               |               |
| 291 |               |               |               |               |
| 292 | 1.935 ± 0.323 | 18.56 ± 0.266 | 0.518 ± 0.004 |               |
| 293 | 2.608 ± 0.507 | 16.17 ± 0.553 | 0.382 ± 0.005 |               |
| 294 | 2.297 ± 0.365 | 12.48 ± 0.251 | 0.489 ± 0.002 |               |
| 295 |               |               |               |               |
| 296 |               |               |               |               |
| 297 |               |               |               |               |
| 298 | 3.202 ± 0.661 | 9.95 ± 0.387  | 0.380 ± 0.003 |               |

|     |               |               |               |
|-----|---------------|---------------|---------------|
| 299 | 2.166 ± 0.255 | 6.84 ± 0.121  | 0.322 ± 0.002 |
| 300 |               |               |               |
| 301 |               |               |               |
| 302 |               |               |               |
| 303 | 3.522 ± 0.807 | 9.57 ± 0.600  | 0.374 ± 0.009 |
| 304 |               |               |               |
| 305 | 3.965 ± 0.757 | 10.16 ± 0.646 | 0.281 ± 0.005 |
| 306 | 4.271 ± 0.877 | 8.21 ± 0.434  | 0.286 ± 0.005 |
| 307 | 3.801 ± 0.700 | 8.44 ± 0.224  | 0.256 ± 0.004 |
| 308 | 2.345 ± 0.363 | 5.96 ± 0.151  | 0.012 ± 0.002 |
| 309 |               |               |               |
| 310 | 3.730 ± 0.835 | 7.93 ± 0.599  |               |
| 311 |               | 10.82 ± 0.652 | 0.291 ± 0.005 |

---

\* Signal present up to .030 seconds

\*\* Signal present up to .050 seconds

† *Modelfree* calculation did not assign a model to residue.

Blank spaces correspond to residues with relaxation values that could not be obtained.

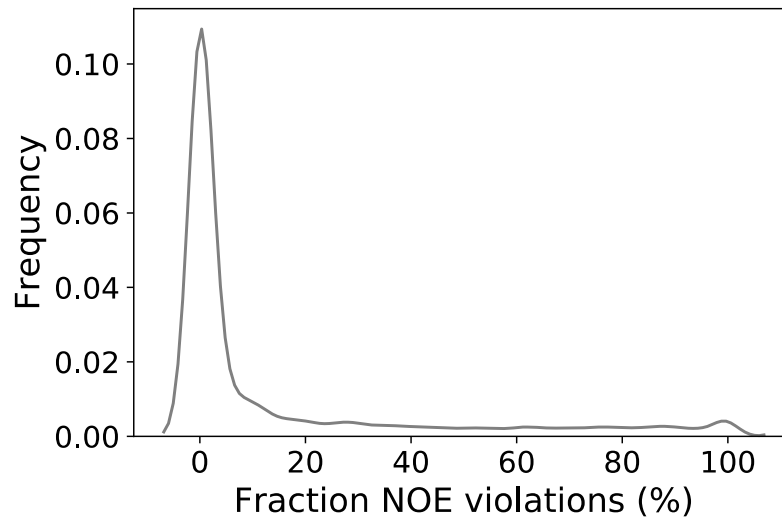

**Supplementary Figure 1.** Fraction of wildtype MD frames that violate the NOE upper distance restraint values for the 2,201 determined restraints from the NMR structure 2FEJ<sup>21</sup>.



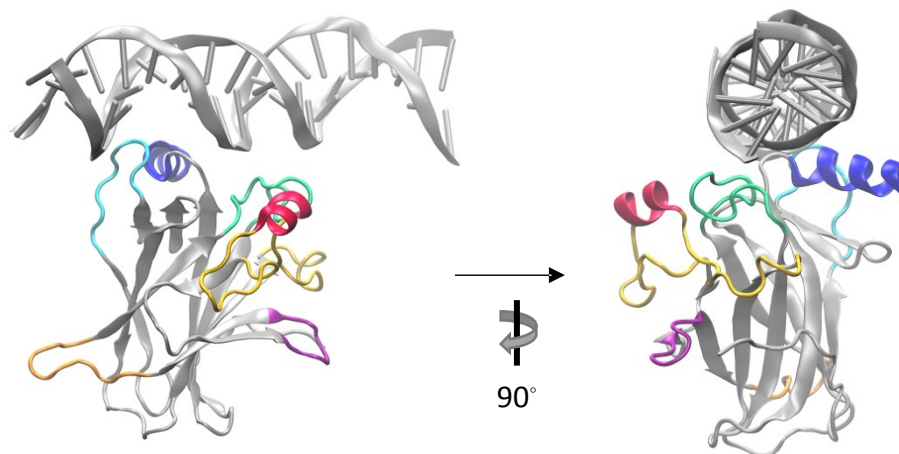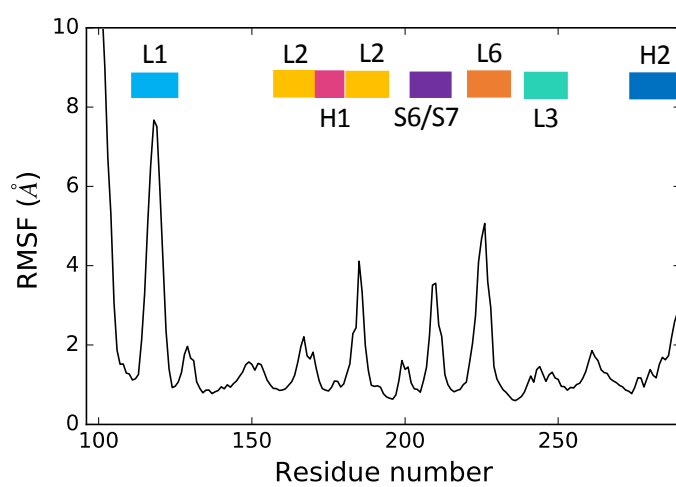

**Supplementary Figure 2.** Alpha carbon RMSF. Functionally important structural motifs are highlighted in the DNA-bound structure (top panel).

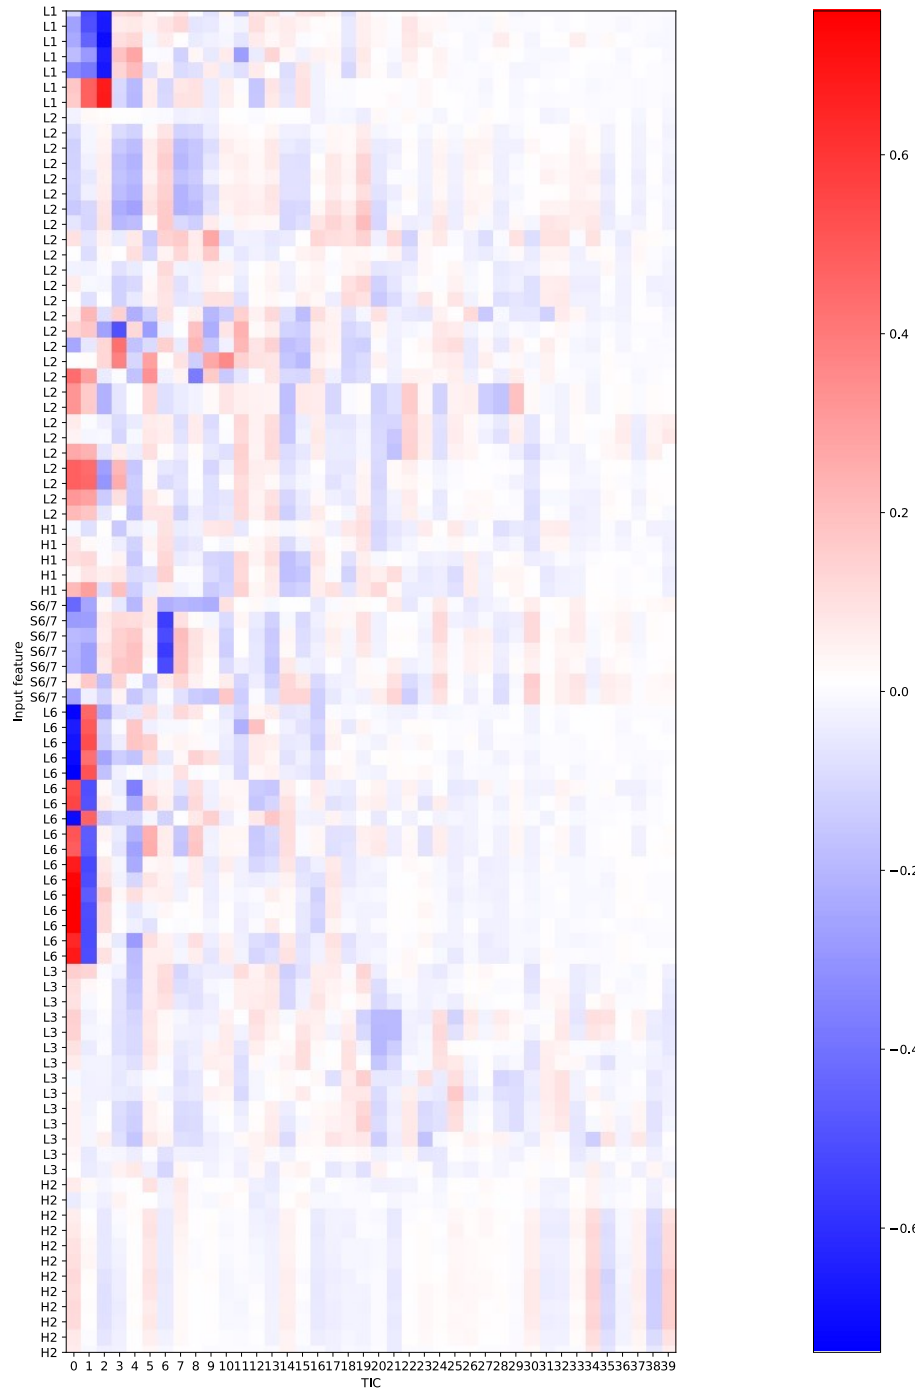

**Supplementary Figure 3.** tICA correlation for features incorporating functionally-important motifs in the protein (H1, H2, L2, L3, S6/7) in addition to L1 and L6.

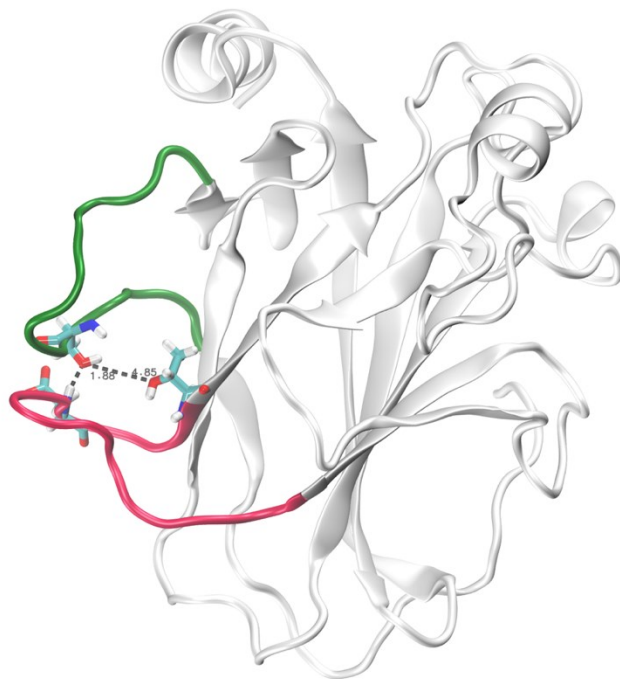

**Supplementary Figure 4.** Example of frame exhibiting most stable intra-loop hydrogen bonds, involving Ser116 in L1 and Asp228 or Thr231 in L6.

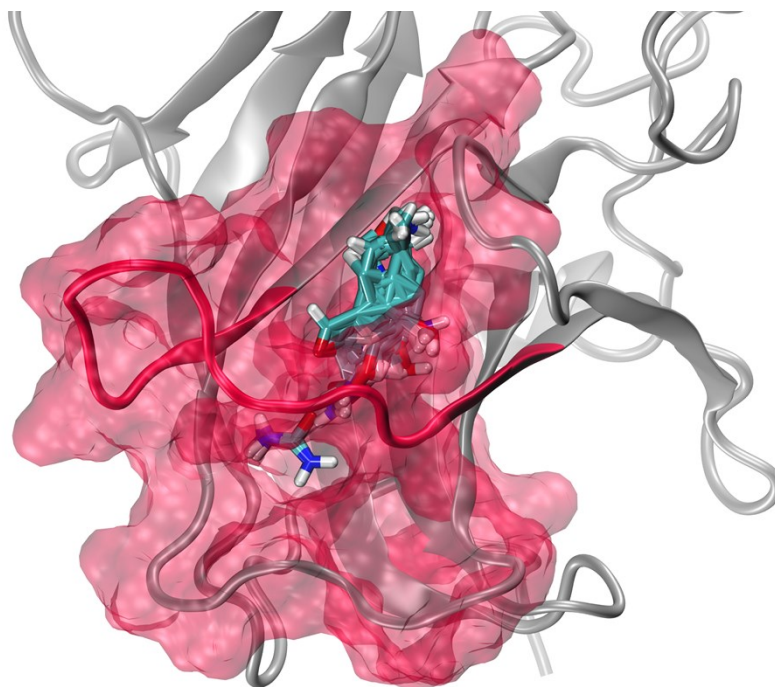

**Supplementary Figure 5.** Representation of the cryptic channel spanning loop L6 in the recessed Y220C metastable state. FTMap<sup>11</sup> probes indicating hotspots for drug binding are shown in licorice.

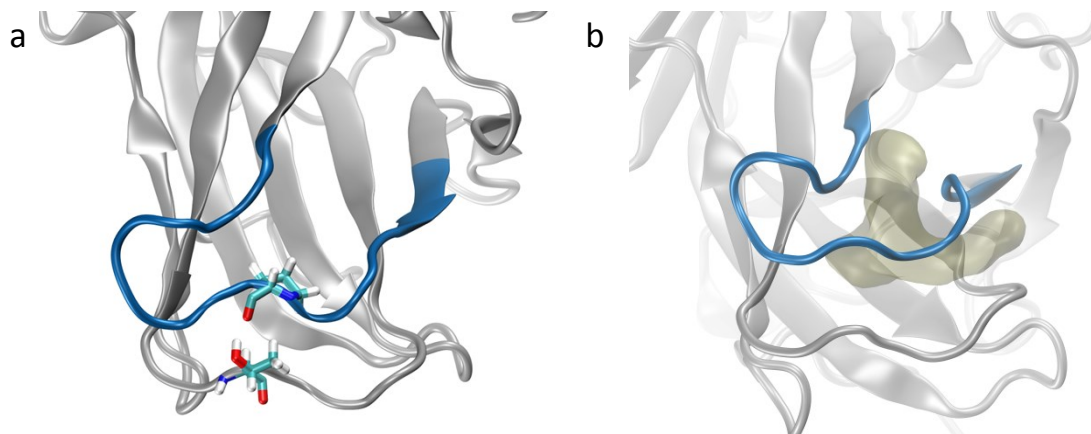

**Supplementary Figure 6.** (a) Representation of the Thr149-Pro222 interaction thought to stabilize the bent L6 conformation observed in the mutant-exclusive states. (b) Surface representation of the L6 pocket in the mutant-exclusive states.

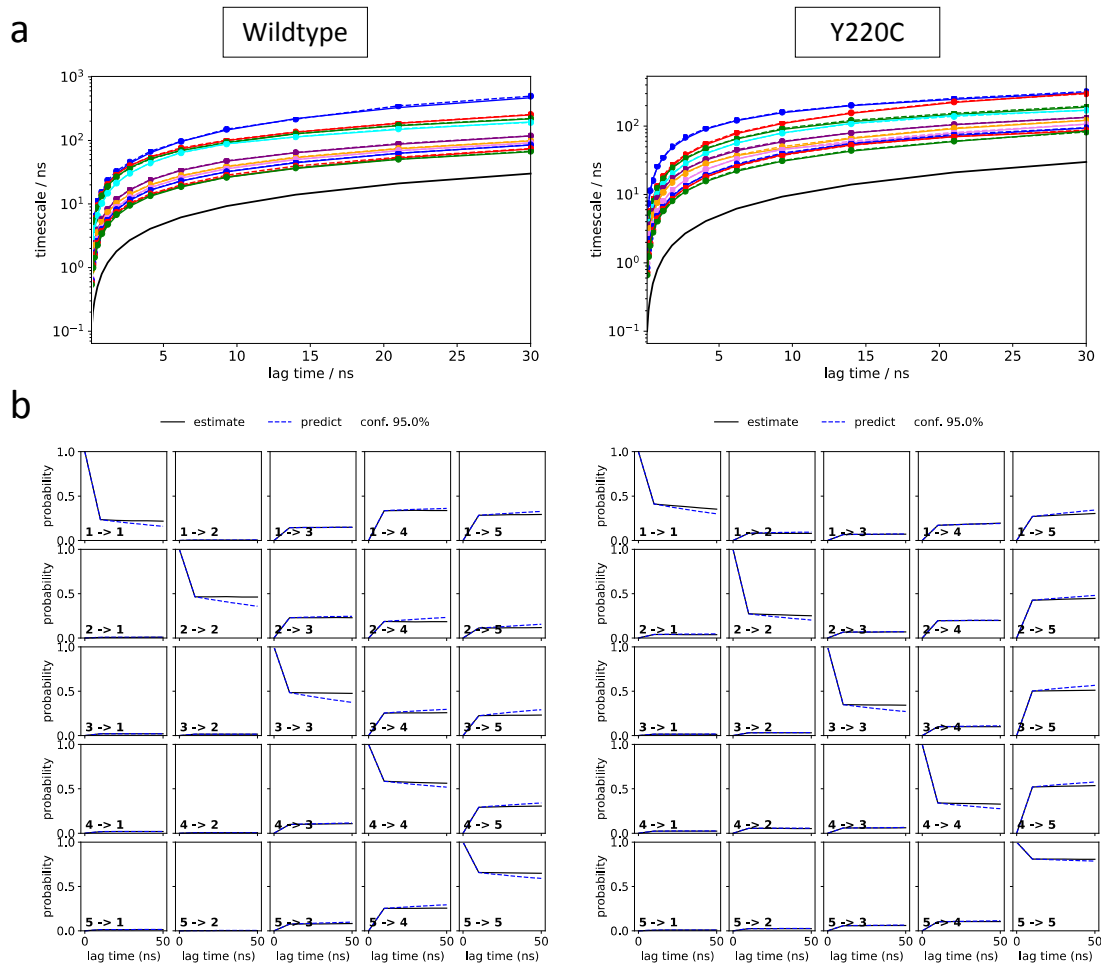

**Supplementary Figure 7. L1 MSM model validation analysis: (a) Implied timescale plots and (b) Chapman-Kolmogorov tests.**

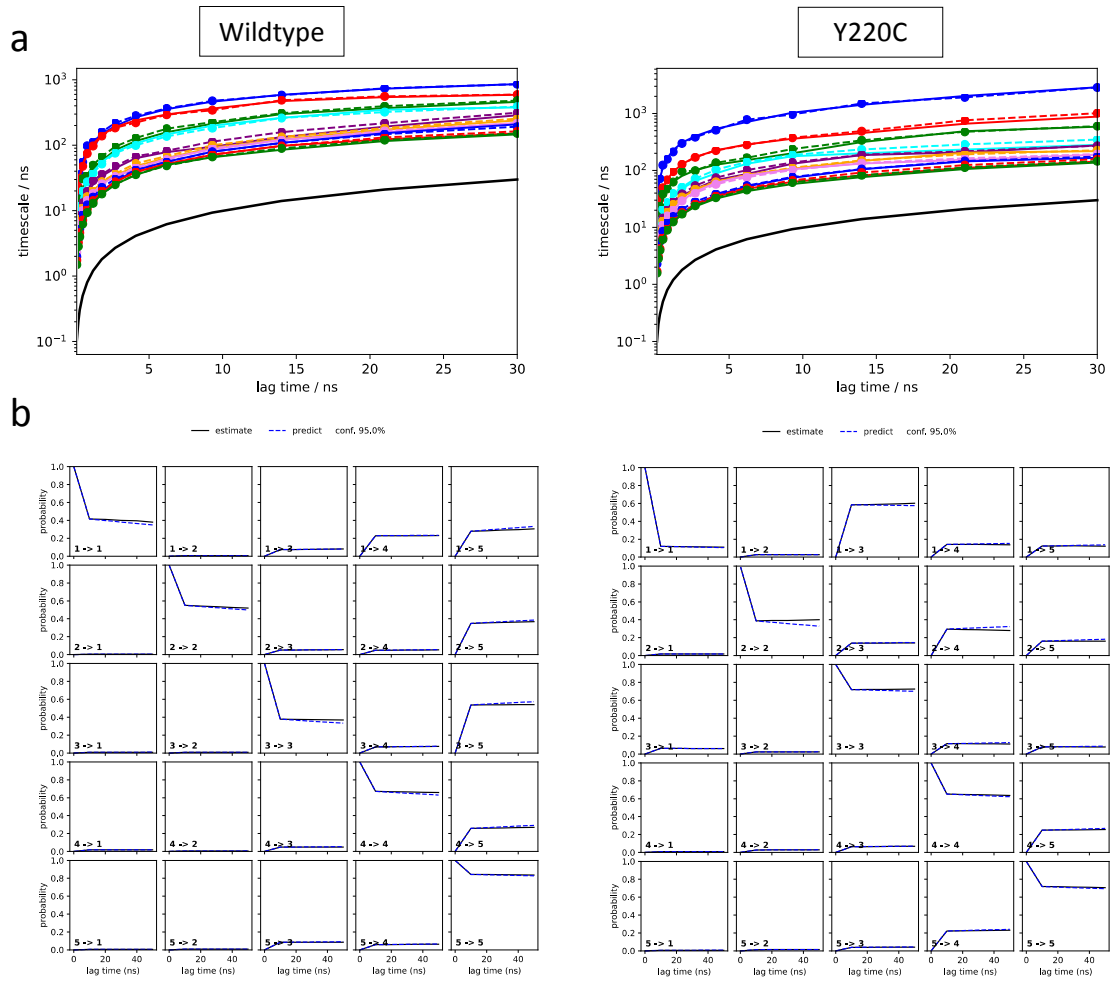

**Supplementary Figure 8. L6 MSM model validation analysis: (a) Implied timescale plots and (b) Chapman-Kolmogorov tests.**

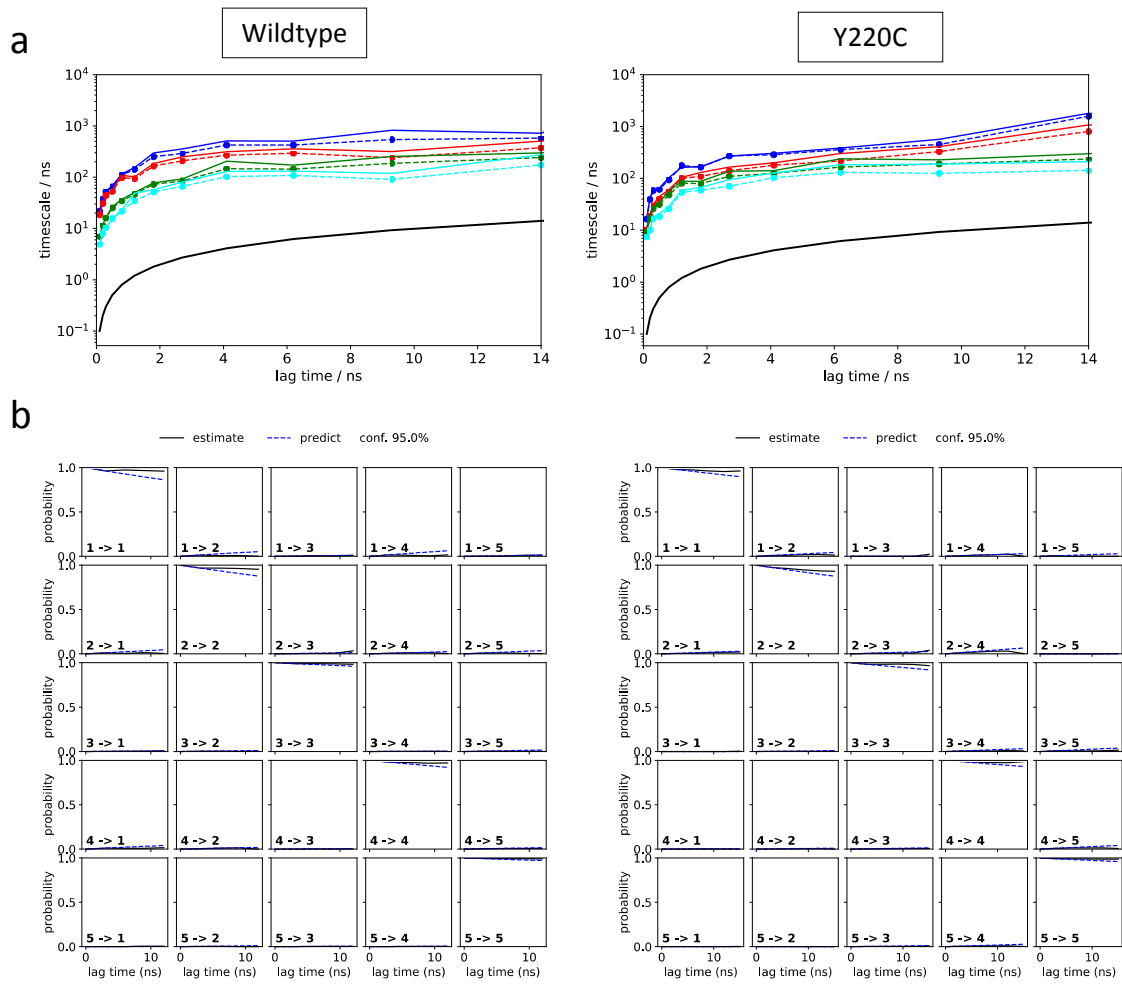

**Supplementary Figure 9.** L1 HMM model validation analysis: (a) Implied timescale plots and (b) Chapman-Kolmogorov tests.



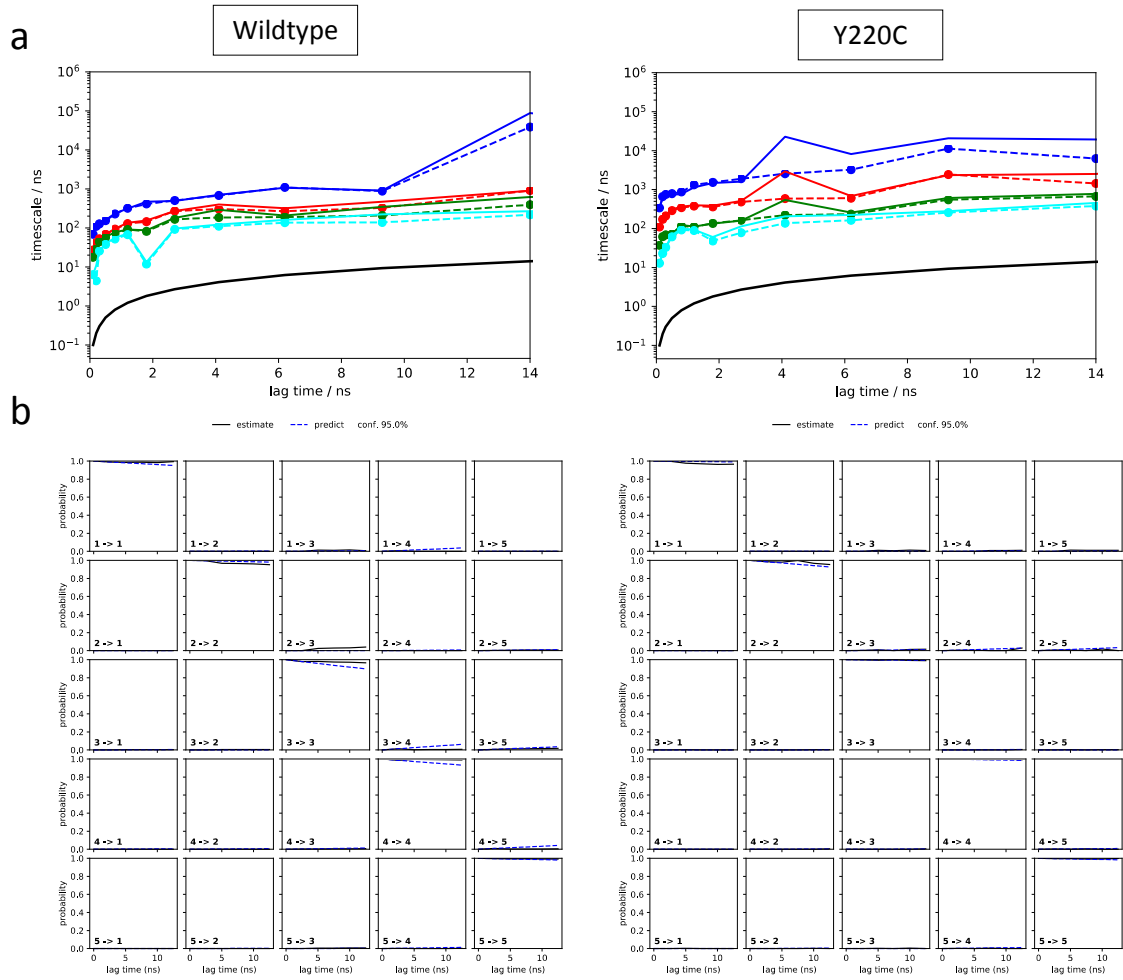

**Supplementary Figure 10.** L6 HMM model validation analysis: (a) Implied timescale plots and (b) Chapman-Kolmogorov tests.

## References

- 1 D. A. Case, V. Babin, J. T. Berryman, R. M. Betz, Q. Cai, D. S. Cerutti, I. T.E. Cheatham, T. A. Darden, R. E. Duke, H. Gohlke, A. W. Goetz, S. Gusarov, N. Homeyer, P. Janowski, J. Kaus, I. Kolossváry, A. Kovalenko, T. S. Lee, S. LeGrand, T. Luchko, R. Luo, B. Madej, K. M. Merz, F. Paesani, D. R. Roe, A. Roitberg, R. C. Sagui, Salomon-Ferrer, G. Seabra, C. L. Simmerling, W. Smith, J. Swails, R. C. Walker, J. Wang, R. M. Wolf, X. Wu and P. A. Kollman, 2014.
- 2 W. L. Jorgensen, J. Chandrasekhar, J. D. Madura, R. W. Impey and M. L. Klein, *J. Chem. Phys.*, 1983, **79**, 926–932.
- 3 Y. P. Pang, *J. Mol. Model.*, 1999, **5**, 196–202.
- 4 J. A. Maier, C. Martinez, K. Kasavajhala, L. Wickstrom, K. E. Hauser and C. Simmerling, *J. Chem. Theory Comput.*, 2015, **11**, 3696–3713.
- 5 R. D. Malmstrom, A. P. Kornev, S. S. Taylor and R. E. Amaro, *Nat. Commun.*, 2015, **6**, 7588.
- 6 L. C. T. Pierce, R. Salomon-Ferrer, C. Augusto F. De Oliveira, J. A. McCammon and R. C. Walker, *J. Chem. Theory Comput.*, 2012, **8**, 2997–3002.
- 7 K. A. Beauchamp, G. R. Bowman, T. J. Lane, L. Maibaum, I. S. Haque and V. S. Pande, *J. Chem. Theory Comput.*, 2011, **7**, 3412–3419.
- 8 M. K. Scherer, B. Trendelkamp-Schroer, F. Paul, G. Perez-Hernandez, M. Hoffmann, N. Plattner, C. Wehmeyer, J.-H. Prinz and F. Noe, *J. Chem. Theory Comput.*, 2015, **11**, 5525–5542.
- 9 G. Pérez-Hernández, F. Paul, T. Giorgino, G. De Fabritiis and F. Noé, *J. Chem. Phys.*, 2013, **139**, 015102.
- 10 J. D. Durrant, L. Votapka and R. E. Amaro, *J. Chem. Theory Comput.*, 2014, **10**, 5047–5056.
- 11 D. Kozakov, L. E. Grove, D. R. Hall, T. Bohnuud, S. Mottarella, L. Luo, B. Xia, D. Beglov and S. Vajda, *Nat. Protoc.*, 2015, **10**, 733–755.
- 12 R. T. McGibbon, K. A. Beauchamp, M. P. Harrigan, C. Klein, J. M. Swails, C. X. Hernandez, C. R. Schwantes, L.-P. Wang, T. J. Lane and V. S. Pande, *Biophys. J.*, 2015, **109**, 1528–1532.
- 13 K. B. Wong, B. S. DeDecker, S. M. V. Freund, M. R. Proctor, M. Bycroft and A. R. Fersht, *Proc. Natl. Acad. Sci. USA*, 1999, **96**, 8438–8442.
- 14 F. Delaglio, S. Grzesiek, G. W. Vuister, G. Zhu, J. Pfeifer and A. Bax, *J. Biomol. NMR*, 1995, **6**, 277–293.
- 15 W. F. Vranken, W. Boucher, T. J. Stevens, R. H. Fogh, A. Pajon, M. Llinas, E. L. Ulrich, J. L. Markley, J. Ionides and E. D. Laue, *Proteins*, 2005, **59**, 687–696.
- 16 A. M. Mandel, M. Akke and A. G. Palmer, *J. Mol. Biol.*, 1995, **246**, 144–163.

- 17 A. G. Palmer, M. Rance and P. E. Wright, *J. Am. Chem. Soc.*, 1991, **113**, 4371–4380.
- 18 R. Cole and J. P. Loria, *J. Biomol. NMR*, 2003, **26**, 203–213.
- 19 C. o. M. D. b. N. Spectroscopy, Tutorials at CoMD/NMR and NYSBC.
- 20 J. A. Rasquinha, A. Bej, S. Dutta and S. Mukherjee, *Biochemistry*, 2017, **56**, 4962–4971.
- 21 J. M. Pérez Cañadillas, H. Tidow, S. M. V. Freund, T. J. Rutherford, H. C. Ang and A. R. Fersht, *Proc. Natl. Acad. Sci. U. S. A.*, 2006, **103**, 2109–2114.
